# Supplementary material
Source: publisher site journal article supplement (https://www.dovepress.com/article/211776)
Supplement: Supplementary file 1 [file get_supplementary_file.php]

**Supplement Table 1: Search Criteria for Systematic Review**

| Search Strategy for MedLine |
| --- |
| ("Metabolic Syndrome X"[Mesh] OR "metabolic syndrome"[tiab] OR "insulin resistance syndrome"[tiab] OR "dysmetabolic syndrome"[tiab] OR "reaven's syndrome"[tiab] OR "metabolic cardiovascular syndrome"[tiab] OR "cardiometabolic syndrome"[tiab] OR reaven[tiab] OR reavens[tiab] OR reaven's[tiab]) AND ("Exercise"[Mesh] OR "Exercise Therapy"[Mesh] OR exercise[tiab] OR “physical activity”[tiab] OR pedometer [tiab] OR accelerometer [tiab] OR aerobic [tiab] OR walking [tiab] OR “low impact” [tiab] OR “high intensity” [tiab] OR “resistance training” [tiab] OR “interval training” [tiab] OR activity [tiab] OR “lifestyle intervention” [tiab] OR “lifestyle interventions” [tiab]) AND ("Controlled Clinical Trial" [Publication Type] OR "Controlled Clinical Trials as Topic"[Mesh] OR "randomized controlled" [tiab] OR "randomised controlled" [tiab] OR "controlled clinical" [tiab] OR randomized [tiab] OR randomised [tiab] OR allocated [tiab] OR "systematic review" [tiab] OR "metaanalysis" [tiab] OR "meta-analysis" [tiab] OR "controlled trial" [tiab]) |

**Supplement Table 2: Downs and Black Checklist**

| **Study Title** | **Reporting (0-10)** | **External Validity (0-3)** | **Internal Validity – Bias (0-7)** | **Internal Validity – Confounding (Selection Bias) (0-6)** | **Power (0-1)** | **Total (0-28)** |
| --- | --- | --- | --- | --- | --- | --- |
| **Anderssen 2007** | 6 | 1 | 5 | 4 | 0 | 16 |
| **Pettman 2009** | 8 | 3 | 5 | 5 | 1 | 22 |
| **Oh 2010** | 9 | 3 | 5 | 5 | 0 | 22 |
| **Liu 2015** | 7 | 3 | 5 | 4 | 0 | 20 |
| **Tjonna 2008** | 8 | 1 | 5 | 4 | 1 | 19 |
| **Stensvold 2010** | 8 | 3 | 5 | 4 | 0 | 20 |
| **Damirchi 2014** | 9 | 1 | 5 | 2 | 0 | 17 |
| **Mora-Rodriguez 2018** | 9 | 2 | 5 | 4 | 1 | 21 |
